# Supplementary material for: Glutathione S-Transferase Genes Involved in Response to Short-Term Heat Stress in Tetranychus urticae (Koch)
Source: MDPI journal article supplement (doi:10.3390/antiox13040442), 2024-04-08
Supplement: s1 [file s1]

**Table S1.** The primers used for cloning of six GST genes.

| Gene ID        | Primer Name       | Sequence (5'-3')             |
|----------------|-------------------|------------------------------|
| XM_015925628.2 | <i>TuGSTm1</i> -F | ATGGCTCCTGTTCTTGGCTA         |
| XM_015925628.2 | <i>TuGSTm1</i> -R | CTCCTCAGGGGGGTTGTG           |
| XM_015927346.2 | <i>TuGSTm2</i> -F | ATGGCACCTGTTCTCGGTTA         |
| XM_015927346.2 | <i>TuGSTm2</i> -R | CTCTGAACCTTTTGGAGACTGGAG     |
| XM_015927509.2 | <i>TuGSTm3</i> -F | ATGGCTCCTATTCTCGGTTATTG      |
| XM_015927509.2 | <i>TuGSTm3</i> -R | TTCAATTGAACCACCAAATTTAGCC    |
| XM_015932051.2 | <i>TuGSTo</i> -F  | ATGGGTTTTGGAGCATTTGC         |
| XM_015932051.2 | <i>TuGSTo</i> -R  | GTTTTTGCCAACAAGTCCGT         |
| XM_015936066.2 | <i>TuGSTd1</i> -F | ATGCCTTTGCAATTATATTACGA      |
| XM_015936066.2 | <i>TuGSTd1</i> -R | TGAGCTTTTAGAAGAAATTGCTT      |
| XM_015937313.2 | <i>TuGSTd2</i> -F | ATGGATTTATATTACATGGCTGAAAGTC |
| XM_015937313.2 | <i>TuGSTd2</i> -R | TTGAGCTCTAGCAATTGCATC        |
