# Supplementary material for: Glutathione S-Transferase Genes Involved in Response to Short-Term Heat Stress in Tetranychus urticae (Koch)
Source: MDPI journal article supplement (doi:10.3390/antiox13040442), 2024-04-08
Supplement: s1 [file s1]

**Table S2.** The primers used for RT-qPCR of six GST genes.

| Gene ID        | Primer Name         | Sequence (5'-3')     |
|----------------|---------------------|----------------------|
| XM_015925628.2 | <i>TuGSTm1</i> -F   | TGGCTCCTGTTCTTGGCTAT |
| XM_015925628.2 | <i>TuGSTm1</i> -R   | TCCGGAGCTGGTCCATAGTT |
| XM_015927346.2 | <i>TuGSTm2</i> -F   | TCGGTTCGGAAGAAGCTGAG |
| XM_015927346.2 | <i>TuGSTm2</i> -R   | GACGCTTCCTCACCAGCAAA |
| XM_015927509.2 | <i>TuGSTm3</i> -F   | GGCTCATACAGGCCAAGAGT |
| XM_015927509.2 | <i>TuGSTm3</i> -R   | TAGCGGATGATAGCGACCGT |
| XM_015932051.2 | <i>TuGSTo</i> -F    | GGAGCATTTGCAGGCAATCA |
| XM_015932051.2 | <i>TuGSTo</i> -R    | AGAACTCGCCTGACGAATGG |
| XM_015936066.2 | <i>TuGSTd1</i> -F   | CAATCGATGGCTGCATTGGG |
| XM_015936066.2 | <i>TuGSTd1</i> -R   | CGATTCGAGTGAGGCTGGTT |
| XM_015937313.2 | <i>TuGSTd2</i> -F   | AGTCCACCTTGTCGAACAGT |
| XM_015937313.2 | <i>TuGSTd2</i> -R   | TCAACCAAAGTGGAACCACA |
| JN881327.1     | $\alpha$ -tubulin-F | TCTTGTCCTTACCCTCGTA  |
| JN881327.1     | $\alpha$ -tubulin-R | TTCCATGTCGAGGGTCACA  |
