# Supplementary material for: Glutathione S-Transferase Genes Involved in Response to Short-Term Heat Stress in Tetranychus urticae (Koch)
Source: MDPI journal article supplement (doi:10.3390/antiox13040442), 2024-04-08
Supplement: s1 [file s1]

**Table S3.** The FPKM value of six GST genes.

| <b>Gene<br/>Name</b> | <b>Control<br/>1</b> | <b>Control<br/>2</b> | <b>Control<br/>3</b> | <b>Control<br/>4</b> | <b>Treat 1</b> | <b>Treat 2</b> | <b>Treat 3</b> | <b>Treat 4</b> |
|----------------------|----------------------|----------------------|----------------------|----------------------|----------------|----------------|----------------|----------------|
| <i>TuGSTm1</i>       | 107.03               | 120.47               | 101.73               | 122.816              | 179.259        | 162.455        | 177.664        | 156.223        |
| <i>TuGSTm2</i>       | 9.86                 | 7.725                | 10.715               | 6.261                | 14.253         | 11.566         | 12.069         | 10.01          |
| <i>TuGSTm3</i>       | 10.468               | 9.706                | 9.727                | 12.128               | 12.856         | 12.439         | 14.226         | 14.662         |
| <i>TuGSTo</i>        | 42.179               | 46.772               | 40.462               | 48.41                | 73.19          | 80.259         | 82.111         | 73.954         |
| <i>TuGSTd1</i>       | 32.077               | 29.769               | 22.684               | 32.411               | 40.634         | 32.097         | 38.255         | 35.31          |
| <i>TuGSTd2</i>       | 5.984                | 6.984                | 6.221                | 8.117                | 11.656         | 12.778         | 14.591         | 11.935         |
